# Supplementary material for: Cytotoxicity, Epidermal Barrier Function and Cytokine Evaluation after Antiseptic Treatment in Bioengineered Autologous Skin Substitute
Source: MDPI journal article supplement (doi:10.3390/biomedicines10061453), 2022-06-19
Supplement: s1 [file s1]

**Table S1.** Cell viability percentages for each treatment and control at days 6, 9, 13, and 16; n = 3, values expressed as mean  $\pm$  SEM.

| Treatment                 | D6                | D9                 | D13                | D16               |
|---------------------------|-------------------|--------------------|--------------------|-------------------|
| Ethanol                   | 3.50% $\pm$ 1.79  | 0.69% $\pm$ 0.68   | 0% $\pm$ 0         | 0% $\pm$ 0        |
| Chlorhexidine digluconate | 71.01% $\pm$ 3.21 | 78.57% $\pm$ 8.44  | 0.20% $\pm$ 0.12   | 0.03% $\pm$ 0.03  |
| Sodium hypochlorite       | 78.16% $\pm$ 7.83 | 96.24% $\pm$ 0.64  | 97.32% $\pm$ 1.25  | 78.83% $\pm$ 9.70 |
| Povidone iodine           | 74.99% $\pm$ 6.39 | 54.71% $\pm$ 12.39 | 25.44% $\pm$ 11.84 | 8.30% $\pm$ 3.27  |
| Polyhexanide              | 11.09% $\pm$ 3.21 | 0.11% $\pm$ 0.11   | 0.05% $\pm$ 0.04   | 0.90% $\pm$ 0.79  |
| Control                   | 90.48% $\pm$ 6.77 | 97.18% $\pm$ 2.31  | 90.15% $\pm$ 4.05  | 87.02% $\pm$ 2.06 |

**Table S2.** IL-10 concentration levels in BASS supernatants for each treatment and control at days 6, 9, and 16; n = 3, values expressed as mean (pg/mL).

| Treatment                 | D6               | D9               | D16              |
|---------------------------|------------------|------------------|------------------|
| Ethanol                   | 26.13 $\pm$ 1.19 | 12.06 $\pm$ 2.33 | 13.21 $\pm$ 0.28 |
| Chlorhexidine digluconate | 22.13 $\pm$ 0.59 | 16.33 $\pm$ 0.56 | 12.83 $\pm$ 0.80 |
| Sodium hypochlorite       | 25.60 $\pm$ 1.15 | 17.03 $\pm$ 0.56 | 22.58 $\pm$ 0.84 |
| Povidone iodine           | 22.41 $\pm$ 0.31 | 15.64 $\pm$ 1.74 | 14.42 $\pm$ 0.73 |
| Polyhexanide              | 29.98 $\pm$ 3.72 | 17.38 $\pm$ 1.88 | 15.64 $\pm$ 0.56 |
| Control                   | 23.49 $\pm$ 2.29 | 16.78 $\pm$ 0.79 | 21.82 $\pm$ 1.11 |

**Table S3.** bFGF concentration levels in BASS supernatants for each treatment and control at days 6, 9, and 16; n = 3, values expressed as mean (pg/mL).

| Treatment                 | D6                  | D9                   | D16                  |
|---------------------------|---------------------|----------------------|----------------------|
| Ethanol                   | 963.00 $\pm$ 57.50  | 5336.75 $\pm$ 336.25 | 565.50 $\pm$ 5.00    |
| Chlorhexidine digluconate | 888.00 $\pm$ 47.50  | 605.50 $\pm$ 10.00   | 871.75 $\pm$ 18.75   |
| Sodium hypochlorite       | 743.00 $\pm$ 100.00 | 720.50 $\pm$ 22.50   | 1003.00 $\pm$ 125.00 |
| Povidone iodine           | 760.50 $\pm$ 80.00  | 700.50 $\pm$ 5.00    | 2841.00 $\pm$ 55.50  |
| Polyhexanide              | 748.00 $\pm$ 67.50  | 1494.25 $\pm$ 101.25 | 583.00 $\pm$ 2.50    |
| Control                   | 801.75 $\pm$ 21.25  | 670.50 $\pm$ 15.00   | 711.75 $\pm$ 13.75   |

**Table S4.** TNF- $\alpha$  concentration levels in BASS supernatants for each treatment and control at days 6, 9, and 16; n = 3, values expressed as mean (pg/mL).

| Treatment                 | D6             | D9            | D16           |
|---------------------------|----------------|---------------|---------------|
| Ethanol                   | 94.71 ± 4.79   | 85.54 ± 3.54  | 93.25 ± 7.92  |
| Chlorhexidine digluconate | 77.21 ± 0.21   | 81.79 ± 6.04  | 82.42 ± 7.92  |
| Sodium hypochlorite       | 74.50 ± 5.83   | 83.25 ± 2.92  | 82.42 ± 12.09 |
| Povidone iodine           | 77.00 ± 2.50   | 87.21 ± 10.63 | 85.33 ± 4.17  |
| Polyhexanide              | 101.38 ± 18.13 | 77.63 ± 4.79  | 97.83 ± 5.00  |
| Control                   | 81.38 ± 11.05  | 79.08 ± 1.25  | 101.58 ± 2.09 |
